# Supplementary material for: Phytoplankton Diversity and Community Composition along the Estuarine Gradient of a Temperate Macrotidal Ecosystem: Combined Morphological and Molecular Approaches
Source: PubMed Central journal article supplement (PMC3981767; doi:10.1371/journal.pone.0094110), 2014-04-09

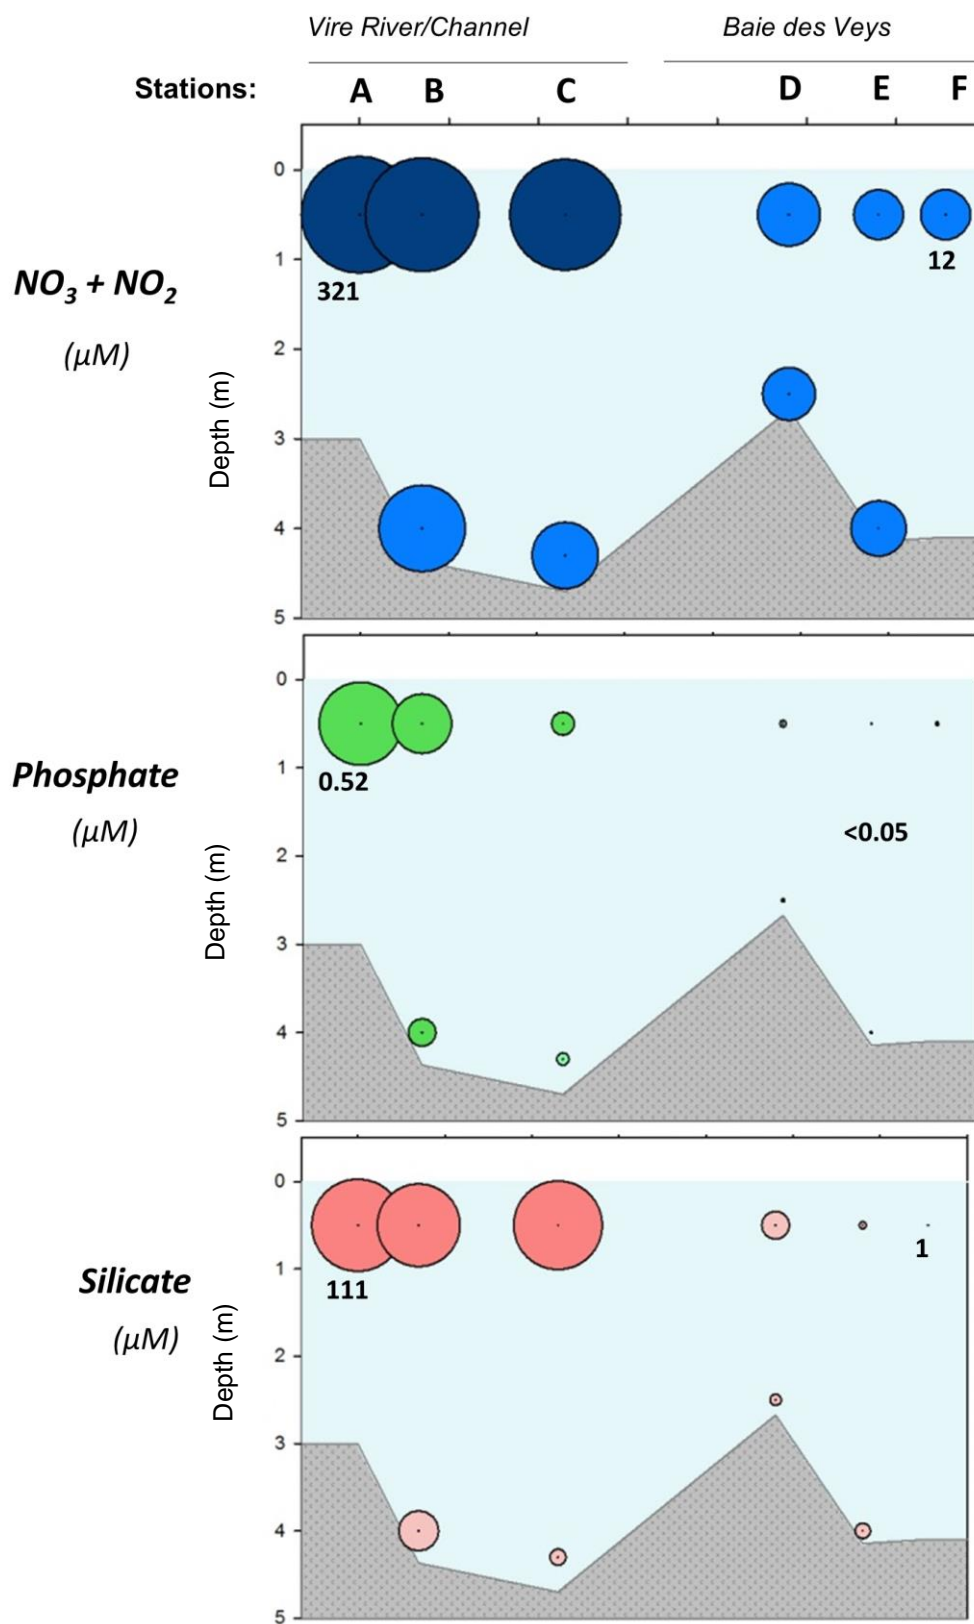

Supplement: pone.0094110.s001.pdf [file pone.0094110.s001.pdf]
